# Supplementary material
Source: PubMed Central journal article supplement (PMC2486273)
Supplement: emboj2008116s1.pdf [file emboj2008116s1.pdf]

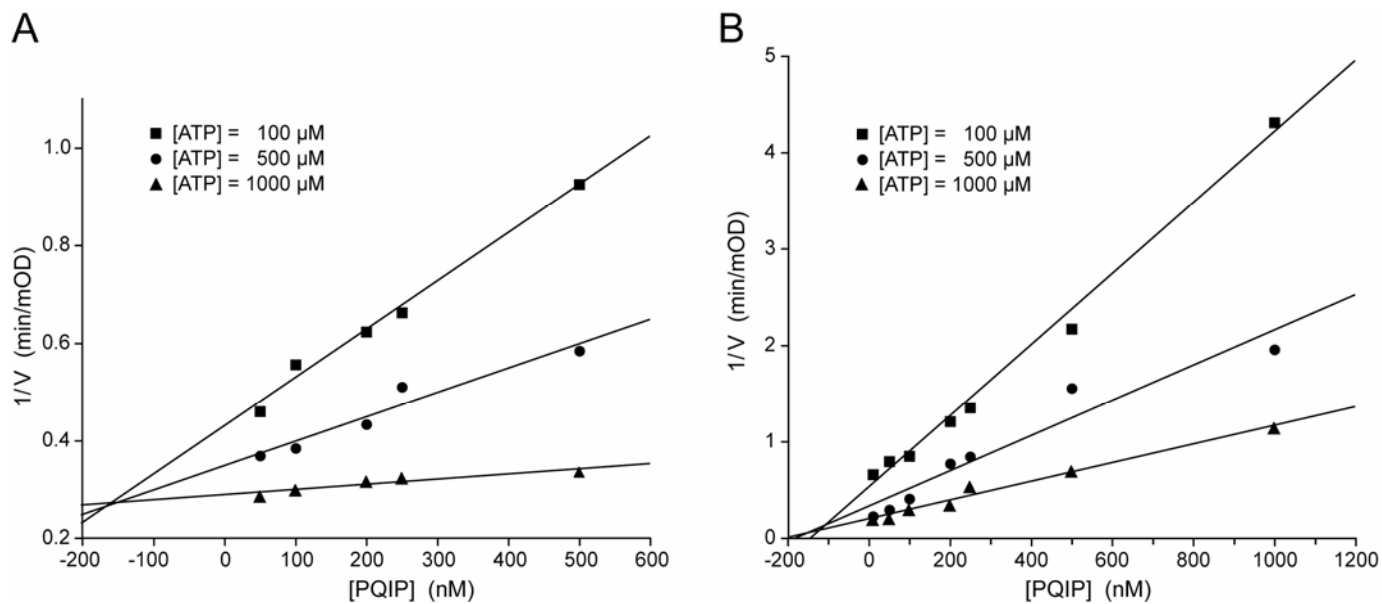

**Figure S1** Determination of  $K_i$  for PQIP inhibition of IGF1RK-0P (**A**) and IGF1RK-3P (**B**). Initial rates of peptide substrate (KKEEEEYMMMM) phosphorylation at various PQIP concentrations and at ATP concentrations of 100, 500, and 1000  $\mu\text{M}$  were determined using a spectrophotometric assay (see Materials and methods section).  $K_i$  values were determined from linear fits of  $V^{-1}$  vs. [PQIP] according to Dixon (Dixon, 1953), and are 157 nM and 140 nM for IGF1RK-0P and IGF1RK-3P, respectively.

## Reference

Dixon, M (1953) The determination of enzyme inhibitor constants. *Biochem J* **55**: 170-171
